# Supplementary material for: Methods Combining Genomic and Epidemiological Data in the Reconstruction of Transmission Trees: A Systematic Review
Source: MDPI journal article supplement (doi:10.3390/pathogens11020252), 2022-02-15
Supplement: s1 [file s1]

**Table S1.** Excluded articles and reasons for exclusion.

|    | <b>Title</b>                                                                                                                                                   | <b>Reference</b>                   | <b>Reasons for Exclusion</b>                                                                     |
|----|----------------------------------------------------------------------------------------------------------------------------------------------------------------|------------------------------------|--------------------------------------------------------------------------------------------------|
| 1  | Source identification in two criminal cases using phylogenetic analysis of HIV-1 DNA sequences                                                                 | Scaduto et al., 2010 [69]          | Only uses genetic data to infer transmission                                                     |
| 2  | High-resolution typing by integration of genome sequencing data in a large tuberculosis cluster                                                                | Schurch et al., 2010 [70]          | No formal combination of genetic and epidemiological data                                        |
| 3  | Phyldynamic analysis of a viral infection network                                                                                                              | Schiino, 2012 [71]                 | Review on transmission clusters                                                                  |
| 4  | Combining epidemiological and genetic networks signifies the importance of early treatment in HIV-1 transmission                                               | Zarrabi et al., 2012 [72]          | Graphical representation of contact info with a SNP cut-off                                      |
| 5  | Detectable signals of episodic risk effects on acute HIV transmission systems using genetic data                                                               | Alam et al., 2013 [73]             | Only uses a transmission model and not genetic data                                              |
| 6  | Inferring the inter-host transmission of influenza A virus using patterns of intra-host genetic variation                                                      | Stack et al., 2013 [74]            | Cannot use consensus sequence                                                                    |
| 7  | Inferring the source of transmission with phylogenetic data                                                                                                    | Volz et al., 2013 [15]             | Uses simulated data                                                                              |
| 8  | Bayesian Inference of Sampled Ancestor Trees for Epidemiology and Fossil Calibration                                                                           | Gavryushkina et al., 2014 [75]     | Reconstructs a phylogenetic tree with sampled ancestors and not a transmission tree              |
| 9  | Marked microevolution of a unique Mycobacterium tuberculosis strain in 17 years of ongoing transmission in a high risk population                              | Mehaffy et al., 2014 [76]          | No formal combination of genetic and epidemiological data                                        |
| 10 | Two-phase importance sampling for inference about transmission trees                                                                                           | Numminen et al., 2014 [77]         | Each data cluster was analyzed independently from others                                         |
| 11 | Within-host bacterial diversity hinders accurate reconstruction of transmission networks from genomic distance data                                            | Worby et al., 2014 [22]            | Uses only (simulated) genetic data                                                               |
| 12 | The application of genomics to tracing bacterial pathogen transmission                                                                                         | Croucher et Didelot, 2015 [78]     | General overview of use of WGS                                                                   |
| 13 | Phylogenetic visualization of the spread of H7 influenza A viruses                                                                                             | Janies et al., 2015 [79]           | Phylogeographic reconstruction represented by a transmission network                             |
| 14 | The impact of within-herd genetic variation upon inferred transmission trees for foot-and-mouth disease virus                                                  | Valdazo-Gonzalez et al., 2015 [80] | Only uses genetic data to infer transmission                                                     |
| 15 | Ebola Virus Epidemiology and Evolution in Nigeria                                                                                                              | Folarin et al., 2016 [81]          | No formal combination of genetic and epidemiological data                                        |
| 16 | Using genomics data to reconstruct transmission trees during disease outbreaks                                                                                 | Hall et al., 2016 [82]             | Review                                                                                           |
| 17 | Tracing Origins of the Salmonella Bareilly Strain Causing a Food-borne Outbreak in the United States                                                           | Hoffman et al., 2016 [83]          | Geographic mapping of a phylogeny                                                                |
| 18 | Molecular Infectious Disease Epidemiology: Survival Analysis and Algorithms Linking Phylogenies to Transmission Trees                                          | Kenah et al., 2016 [84]            | Enumerates transmission trees compatible with phylogeny and epidemiological data, doesn't select |
| 19 | Infectious Disease Dynamics in Heterogeneous Landscapes                                                                                                        | Parratt et al., 2016 [85]          | Review                                                                                           |
| 20 | Network inference from multimodal data: A review of approaches from infectious disease transmission                                                            | Ray et al., 2016 [86]              | Review                                                                                           |
| 21 | Ecological dynamics of influenza A viruses: cross-species transmission and global migration                                                                    | Ren et al., 2016 [87]              | Phylogeographic reconstruction represented by a transmission network                             |
| 22 | Genomic Analysis of Viral Outbreaks                                                                                                                            | Wohl et al., 2016 [88]             | Review                                                                                           |
| 23 | Epidemiological and Evolutionary Inference of the Transmission Network of the 2014 Highly Pathogenic Avian Influenza H5N2 Outbreak in British Columbia, Canada | Xu et al., 2016 [89]               | Compares two network one from genetic data and the other from epidemiological data               |

|    |                                                                                                                                                                         |                                        |                                                                                                        |
|----|-------------------------------------------------------------------------------------------------------------------------------------------------------------------------|----------------------------------------|--------------------------------------------------------------------------------------------------------|
| 24 | Transmission patterns and evolution of respiratory syncytial virus in a community outbreak identified by genomic analysis                                               | Agoti et al., 2017 [90]                | Only uses genetic data to infer transmission                                                           |
| 25 | Emerging Concepts of Data Integration in Pathogen Phylodynamics                                                                                                         | Baele et al., 2017 [91]                | Review                                                                                                 |
| 26 | Inference of genetic relatedness between viral quaspecies from sequencing data                                                                                          | Glebova et al., 2017 [92]              | Only uses genetic data to infer transmission and cannot use consensus sequence                         |
| 27 | Integrated genomic and interfacility patient-transfer data reveal the transmission pathways of multi-drug-resistant <i>Klebsiella pneumoniae</i> in a regional outbreak | Snitkin et al., 2017 [93]              | Phylogeographic reconstruction represented by a transmission network                                   |
| 28 | Shared Genomic Variants: Identification of Transmission Routes Using Pathogen Deep-Sequence Data                                                                        | Worby et al., 2017 [94]                | Only uses deep sequencing data to infer transmission                                                   |
| 29 | outbreaker2: a modular platform for outbreak reconstruction                                                                                                             | Campbell et al., 2018 [95]             | Implements Transphylo method into outbreaker2 using simulated data (phybreak package)                  |
| 30 | Genomic epidemiology for microbial evolutionary studies and the use of Oxford Nanopore sequencing technology                                                            | Choi et al., 2018 [96]                 | Review                                                                                                 |
| 31 | Bayesian reconstruction of transmission within outbreaks using genomic variants                                                                                         | De Maio et al., 2018 [61]              | Only at a single locus resolution (deep sequencing data), cannot use consensus sequence                |
| 32 | Tracking a serial killer: Integrating phylogenetic relationships, epidemiology, and geography for two invasive meningococcal disease outbreaks                          | Ezeoke et al., 2018 [97]               | Phylogeographic reconstruction represented by a transmission network                                   |
| 33 | Multi-step genomic dissection of a suspected intra-hospital <i>Helicobacter cinaedi</i> outbreak                                                                        | Gotoh et al., 2018 [98]                | No formal combination of genetic and epidemiological data                                              |
| 34 | Estimating Transmission from Genetic and Epidemiological Data: A Metric to Compare Transmission Trees                                                                   | Kendall et al., 2018 [99]              | Transmission tree comparison                                                                           |
| 35 | Phylogenetic patterns recover known HIV epidemiological relationships and reveal common transmission of multiple variants                                               | Leitner et Romero-Severson, 2018 [100] | Uses topology of phylogenetic trees to determine whether direct transmission occurred                  |
| 36 | The relationship between transmission time and clustering methods in <i>Mycobacterium tuberculosis</i> epidemiology                                                     | Meehan et al., 2018 [101]              | Estimates transmission events with the age difference between MRCA node and youngest node in a cluster |
| 37 | When are pathogen genome sequences informative of transmission events?                                                                                                  | Campbell et al., 2018 [20]             | Uses simulated data to compare two methods                                                             |
| 38 | Multihospital Outbreak of a Middle East Respiratory Syndrome Coronavirus Deletion Variant, Jordan: A Molecular, Serologic, and Epidemiologic Investigation              | Payne et al., 2018 [102]               | Only uses epidemiological data to infer transmission                                                   |
| 39 | Nosocomial transmission of influenza: A retrospective cross-sectional study using next generation sequencing at a hospital in England (2012-2014)                       | Blackburn et al., 2019 [103]           | No formal combination of genetic and epidemiological data                                              |
| 40 | Inferring epidemiological links from deep sequencing data: a statistical learning approach for human, animal and plant diseases                                         | Alamil et al., 2019 [62]               | Deep sequencing data                                                                                   |
| 41 | Introduction of Ebola virus into a remote border district of Sierra Leone, 2014: use of field epidemiology and RNA sequencing to describe chains of transmission        | DeSilva et al., 2019 [104]             | Only uses epidemiological data to infer transmission                                                   |
| 42 | Reconstructing foot-and-mouth disease outbreaks: a methods comparison of transmission network models                                                                    | Firestone et al., 2019 [105]           | Transmission tree comparison on simulated data                                                         |

|    |                                                                                                                                                                  |                                          |                                                                                                                                          |
|----|------------------------------------------------------------------------------------------------------------------------------------------------------------------|------------------------------------------|------------------------------------------------------------------------------------------------------------------------------------------|
| 43 | Whole genome sequencing for improved understanding of Mycobacterium tuberculosis transmission in a remote circumpolar region                                     | Guthrie et al., 2019 [106]               | No formal combination of genetic and epidemiological data                                                                                |
| 44 | Transmission Trees on a Known Pathogen Phylogeny: Enumeration and Sampling                                                                                       | Hall et Colijn, 2019 [107]               | Aim is not to reconstruct a transmission tree                                                                                            |
| 45 | Improved characterisation of MRSA transmission using within-host bacterial sequence diversity                                                                    | Hall et al., 2019 [108]                  | Only uses genetic data to infer transmission                                                                                             |
| 46 | Inferring HIV-1 transmission networks and sources of epidemic spread in Africa with deep-sequence phylogenetic analysis                                          | Ratmann et al., 2019 [109]               | Deep sequencing data                                                                                                                     |
| 47 | SharpTNI: Counting and Sampling Parsimonious Transmission Networks under a Weak Bottleneck                                                                       | Sashittal et al., 2019 [110]             | Similar to Hall et Colijn, 2019                                                                                                          |
| 48 | Tracing local and regional clusters of carbapenemase-producing Klebsiella pneumoniae ST512 with whole genome sequencing, Finland, 2013 to 2018                   | van Beek et al., 2019 [111]              | No formal combination of genetic and epidemiological data + uses allele differences                                                      |
| 49 | Estimating Epidemic Incidence and Prevalence from Genomic Data                                                                                                   | Vaughan et al., 2019 [112]               | No difference between phylogeny and transmission tree                                                                                    |
| 50 | Phylogenetic and Demographic Characterization of Directed HIV-1 Transmission Using Deep Sequences from High-Risk and General Population Cohorts/Groups in Uganda | Bbosa et al., 2020 [113]                 | Deep sequencing data                                                                                                                     |
| 51 | StrainHub: a phylogenetic tool to construct pathogen transmission networks                                                                                       | de Bernardi Schneider et al., 2020 [114] | Phylogeographic reconstruction represented by a transmission network                                                                     |
| 52 | TNet: Phylogeny-Based Inference of Disease Transmission Networks Using Within-Host Strain Diversity                                                              | Dhar et al., 2020 [115]                  | Deep sequencing data                                                                                                                     |
| 53 | Modeling Missing Cases and Transmission Links in Networks of Extensively Drug-Resistant Tuberculosis in KwaZulu-Natal, South Africa                              | Nelson et al., 2020 [116] a              | Compares an empirical network (> or = to 5 SNPs difference) with network reconstructed using ergm with different missing cases scenarios |
| 54 | Social Mixing and Clinical Features Linked With Transmission in a Network of Extensively Drug-resistant Tuberculosis Cases in KwaZulu-Natal, South Africa        | Nelson et al., 2020 [117] b              | Graphical representation of contact info with a SNP cut-off                                                                              |
| 55 | Nosocomial outbreak of COVID-19 pneumonia in Wuhan, China                                                                                                        | Wang et al., 2020 [118]                  | Only uses epidemiological data to infer transmission                                                                                     |
| 56 | The emergence of SARS-CoV-2 in Europe and North America                                                                                                          | Worobey et al., 2020 [119]               | Compares simulated data to obtained sequence data then took a phylogeographic approach                                                   |

**Table S2.** Pathogen studied in the selected articles and their estimated mutation rate.

| Pathogen                          | Mutation Rate                                                                                 |
|-----------------------------------|-----------------------------------------------------------------------------------------------|
| FMDV                              | $2.1 \times 10^{-5}$ /site/day [2]                                                            |
| H7N7                              | HA and NA gene $\sim 1 \times 10^{-2}$<br>AND PB2 gene $0.54 \times 10^{-2}$ /site/year [120] |
| H1N1                              | HA and NA gene<br>$3.6 \times 10^{-3}$ /site/year [121]                                       |
| H5N8                              | $6.68 \times 10^{-3}$ /site/year [122]                                                        |
| H3N8                              | HA gene<br>$1.74 \times 10^{-3}$ /site/year [123]                                             |
| RABV                              | $2.9 \times 10^{-4}$ /site/year [124]                                                         |
| SARS-CoV1                         | $5.7 \times 10^{-6}$ /site/day [125]                                                          |
| SARS-CoV2                         | $9.90 \times 10^{-4}$ /site/year [126]                                                        |
| HIV                               | <i>env</i> gene $7.4 \times 10^{-3}$ /site/year [127]                                         |
| Ebola virus                       | $\sim 2 \times 10^{-3}$ /site/year [128]                                                      |
| poliovirus                        | $1.1 \times 10^{-2}$ /site/year [129]                                                         |
| BVDV                              | $3.9 \times 10^{-3}$ /site/year [33]                                                          |
| <i>Salmon isavirus</i>            | HE gene<br>[ $6.1 \times 10^{-6}$ ; $1.13 \times 10^{-3}$ ]/site/year [130,131]               |
| <i>Myxovirus parotidis</i>        | $2.24 \times 10^{-3}$ /site/year [54]                                                         |
| <i>Mycobacterium tuberculosis</i> | $1.15 \times 10^{-7}$ /site/year [17]                                                         |
| <i>Acinetobacter baumannii</i>    | $10^{-6}$ mutation per cell division [132]                                                    |
| <i>Klebsiella pneumoniae</i>      | $3.65 \times 10^{-6}$ /site/year [34]                                                         |
| <i>Staphylococcus aureus</i>      | $3 \times 10^{-6}$ /site/year [133]                                                           |

**Table S3.** Pathogen sequences studied by methods in the non-phylogenetic family. First, we recorded the study time period (D stands for days, M for months and Y for years) then the number of sequences and finally the size of the genome studied either in sequence length in nucleotides (N) or the number of single nucleotide polymorphisms (SNP). CT stands for computational time and NF, for information not found.

| Methods       | Pathogen                          | Time-period | Number of Sequences | Genome Size              | References | CT                    | Epidemiological Unit |
|---------------|-----------------------------------|-------------|---------------------|--------------------------|------------|-----------------------|----------------------|
| Aldrin 2011   | <i>Salmon isavirus</i>            | 6 Y         | 61                  | 891 N                    | [28]       | NF                    | Farm                 |
| Seqtrack      | H1N1                              | 105 D       | 433                 | 3,025 N                  | [16]       | NF                    | Individual           |
|               | H3N8                              | 56 D        | 48                  | 903 N                    | [45]       |                       | Individual           |
|               | <i>Mycobacterium tuberculosis</i> | 15 Y        | 1687                | ~4.1 × 10 <sup>6</sup> N | [46]       |                       | Individual           |
|               | <i>Klebsiella pneumoniae</i>      | 3 Y         | 71                  | ~5.5 × 10 <sup>6</sup> N | [47]       |                       | Individual           |
| Ypma 2012     | H7N7                              | 51 D        | 185                 | 5,354 N                  | [32]       | NF                    | Farm                 |
| Outbreaker    | SARS-CoV1                         | 48 D        | 13                  | 29,731 N                 | [24]       | NF                    | Individual           |
|               | <i>Acinetobacter baumannii</i>    | 9 M         | 19                  | 1207 SNP                 | [36]       |                       | Individual           |
|               |                                   | 3 Y         | 42                  | 4,461,520 N              | [35]       |                       | Individual           |
|               | <i>Klebsiella pneumoniae</i>      | 305 D       | 34                  | 51 SNP                   | [34]       |                       | Individual           |
|               | BVDV                              | ~2 Y        | 12                  | 381 N                    | [33]       |                       |                      |
| Worby 2014    | MRSA                              | 300 D       | 35                  | ~2.8 × 10 <sup>6</sup> N | [37]       | NF                    | Individual           |
| Famulare 2015 | Ebola                             | 25 D        | 78                  | ~19,000 N                | [38]       | NF                    | Individual           |
|               | H1N1                              | 105 D       | 433                 | 3025 N                   |            |                       |                      |
|               | poliovirus                        | ~6 Y        | 358                 | ~2600 N                  |            |                       |                      |
| Bitrugs       | MRSA                              | 300 D       | 35                  | ~2.8 × 10 <sup>6</sup> N | [6]        | NF                    | Individual           |
|               |                                   | ~3 Y        | 40                  | 345 SNP                  | [60]       |                       |                      |
|               |                                   |             | 16                  | 209 SNP                  | [60]       |                       |                      |
| Outbreaker2   | SARS-CoV1                         | 48 D        | 13                  | 29,731 N                 | [30]       |                       | Individual           |
|               | Simulated data                    |             | 20                  |                          | [95]       | 4.5 s/1000 iterations | /                    |

**Table S4.** Pathogen sequences studied by methods in the sequential phylogenetic family. First, we recorded the study time period (D stands for days, M for months and Y for years) then the number of sequences and finally the size of the genome studied either in sequence length in nucleotides (N) or the number of single nucleotide polymorphisms (SNP). CT stands for computational time and NF, for information not found.

| Methods      | Pathogen                          | Time-period | Number of Sequences | Genome Size              | References | CT                          | Epidemiological Unit |
|--------------|-----------------------------------|-------------|---------------------|--------------------------|------------|-----------------------------|----------------------|
| Cottam 2008  | FMDV                              | 96 D        | 22                  | 8,176 N                  | [2]        | NF                          | Farm                 |
| Didelot 2014 | <i>Mycobacterium tuberculosis</i> | ~3 Y        | 33                  | 20 SNP                   | [17]       | 100,000 iterations in 5 min | Individual           |
| Eldholm 2016 | <i>Mycobacterium tuberculosis</i> | 13 Y        | 252                 | 509 SNP                  | [39]       | NF                          | Individual           |
| Transphylo   | SARS-CoV2                         | ~60 D       | 208                 | 29,718 N                 | [53]       |                             | Individual           |
|              | <i>Myxovirus parotidis</i>        | ~1 Y        | 24                  | 51 SNP                   | [54]       |                             | Individual           |
|              | <i>Mycobacterium tuberculosis</i> | 13 Y        | 86                  | 85 SNP                   | [40]       |                             | Individual           |
|              |                                   | 7 Y         | 21                  | 134 SNP                  | [48]       |                             | Individual           |
|              |                                   | 19 Y        | 1857                | ~4.1 × 10 <sup>6</sup> N | [50]       |                             | Individual           |
|              |                                   | 3 Y         | 117                 |                          | [49]       |                             | Individual           |
|              |                                   | ~15 Y       | 329                 | 269 SNP                  | [55]       |                             | Individual           |
|              | <i>Klebsiella pneumoniae</i>      | ~3 Y        | 73                  | ~5.5 × 10 <sup>6</sup> N | [51]       |                             | Individual           |
|              |                                   | 14 M        | 82                  |                          | [52]       |                             |                      |
|              | Simulated data                    |             | 20                  |                          | [95]       | 4.6 s/1000 iterations       | /                    |
| TiTUS        | HIV                               | 18 Y        | 212                 | 1620 N                   | [31]       | NF                          | Individual           |

**Table S5.** Pathogen sequences studied by methods in the simultaneous phylogenetic family. First, we recorded the study time period (D stands for days, M for months and Y for years) then the number of sequences and finally the size of the genome studied either in sequence length in nucleotides (N) or the number of single nucleotide polymorphisms (SNP). CT stands for computational time and NF, for information not found.

| Methods          | Pathogen                          | Time-period | Number of Sequences | Genome Size | References | CT                        | Epidemiological Unit |
|------------------|-----------------------------------|-------------|---------------------|-------------|------------|---------------------------|----------------------|
| Ypma 2013        | FMDV                              | 64 D        | 12                  | 8176 N      | [5]        | NF                        | Farm                 |
| <i>Beastlier</i> | H7N7                              | 51 D        | 185                 | 5354 N      | [18]       | NF                        | Farm                 |
|                  | H5N8                              |             | 37                  | 83 SNP      | [56]       |                           | Farm                 |
| <i>SCOTTI</i>    | FMDV                              | 57 D        | 11                  | 8176 N      | [41]       |                           | Farm                 |
|                  | HIV                               |             |                     |             | [134]      |                           | Individual           |
|                  | <i>Klebsiella pneumoniae</i>      | 305 D       | 34                  | 51 SNP      | [41]       |                           | Individual           |
|                  | Simulated data                    |             | 100                 |             | [41]       | 1-2 h                     | /                    |
| <i>Phybreak</i>  | FMDV                              | 57 D        | 11                  | 30 SNP      | [26]       |                           | Farm                 |
|                  |                                   | 65 D        | 15                  | 58 SNP      |            |                           |                      |
|                  | H7N7                              | 71 D        | 241                 | 293 N       |            | 7 h/ 25000 iterations     | Farm                 |
|                  | <i>Mycobacterium tuberculosis</i> | ~3 Y        | 33                  | 21 SNP      |            | 30 min/ 25000 iterations  | Individual           |
|                  | MRSA                              | 204 D       | 36                  | 27 SNP      |            | 30 min/ 25000 iterations  | Individual           |
|                  | Simulated data                    |             | 50                  | 10,000 N    |            | 1 min/1000 iterations     | /                    |
| Morelli 2012     | FMDV                              | 57 D        | 10                  | 8176 N      | [23]       | NF                        | Farm                 |
|                  |                                   | 65 D        | 15                  |             |            |                           |                      |
| Mollentze 2014   | RABV                              | 464 D       | 176                 | 760 N       | [1]        | NF                        | Individual           |
| Lau 2015         | FMDV                              | 64 D        | 12                  | 8176 N      | [42]       |                           | Farm                 |
|                  | Simulated data                    | ~3 M        | 104                 | 7667 N      | [56]       |                           |                      |
|                  |                                   |             | 150                 | 8000 N      | [42]       | 400,000 iterations 17.7 h | /                    |
| <i>BORIS</i>     | FMDV                              | 2.5 M       | 104                 | 7667 N      | [29]       | NF                        | Farm                 |
| Montazeri 2020   | HIV                               | ~15 Y       | 19                  | ~3000 N     | [43]       |                           | Individual           |
|                  | Ebola                             | ~5 M        | 78                  | ~19,000 N   |            |                           |                      |
|                  | Simulated data                    |             | 50                  | 3000        |            | 3 h                       |                      |

**Table S6.** Details found in online instruction manuals.

| Family                    | Package Name                                   | Details on Epidemiological Data Format | Set Parameters                                                                                                                                                      | Estimated Parameters                                                                                                                                                                                                                                                                             |
|---------------------------|------------------------------------------------|----------------------------------------|---------------------------------------------------------------------------------------------------------------------------------------------------------------------|--------------------------------------------------------------------------------------------------------------------------------------------------------------------------------------------------------------------------------------------------------------------------------------------------|
| Non-phylogenetic          | Seqtrack                                       | /                                      | mu: mutation rate per site per day<br>haplo.length: sequence length in number of nucleotides<br>prox.mat: proximity matrix in case of ties (e.g. spatial distances) | /                                                                                                                                                                                                                                                                                                |
|                           | outbreaker                                     | /                                      | w_dens: generation time distribution<br>f_dens: sampling interval distribution                                                                                      | mu: mutation rate (Exponential)<br>pi: reporting probability (Beta)                                                                                                                                                                                                                              |
|                           | bitrugs<br>(removed from the CRAN repository)  | /                                      | /                                                                                                                                                                   | z: test sensitivity (Beta)<br>p: importation probability (Beta)<br>beta: transmission rate (Exponential)<br>gamma: within host/group genetic diversity (Beta)<br>gamma_gl: between host/group genetic diversity (Beta)<br>genpar: group clustering or transmission chain parameter (Exponential) |
|                           | outbreaker2                                    | Non-dated non-oriented contact data    | w_dens: generation time distribution<br>f_dens: sampling interval distribution                                                                                      | mu: mutation rate (Exponential)<br>pi: reporting probability (Beta)<br>eps: contact reporting coverage (Beta)<br>lambda: noninfectious contact rate (Beta)                                                                                                                                       |
| Sequential phylogenetic   | Transphylo                                     | /                                      | dateT: end of outbreak observation                                                                                                                                  | off.r/off.p: offspring distribution (Negative Binomial)<br>w.shape/w.scale: generation time distribution (Gamma)<br>neg: average time of coalescence of two lineages<br>pi: probability of sampling<br>ws.shape/ws.scale: sampling distribution (Gamma)                                          |
| Simultaneous phylogenetic | beastlier                                      | /                                      | /                                                                                                                                                                   | k: Spatial kernel function<br>i: Infectious period distribution<br>l: Latent period distribution                                                                                                                                                                                                 |
|                           | SCOTTI                                         | /                                      | /                                                                                                                                                                   | maxHosts: maximum number of hosts in the outbreak                                                                                                                                                                                                                                                |
|                           | phybreak<br>(removed from the CRAN repository) | /                                      | wh.model: within-host model                                                                                                                                         | gen.mean (est.)/ gen.shape (fixed): generation interval distribution (Gamma)<br>sample.mean (est.)/ sample.shape (fixed): sampling interval distribution (Gamma)<br>wh.slope: slope of the within-host pathogen population growth<br>mu: mutation rate                                           |
